# Supplementary material for: Biomechanical Properties of Strictures in Crohn’s Disease: Can Dynamic Contrast-Enhanced Ultrasonography and Magnetic Resonance Enterography Predict Stiffness?
Source: MDPI journal article supplement (doi:10.3390/diagnostics12061370), 2022-06-02
Supplement: s1 [file s1]

Figure S1. Regions of Interests

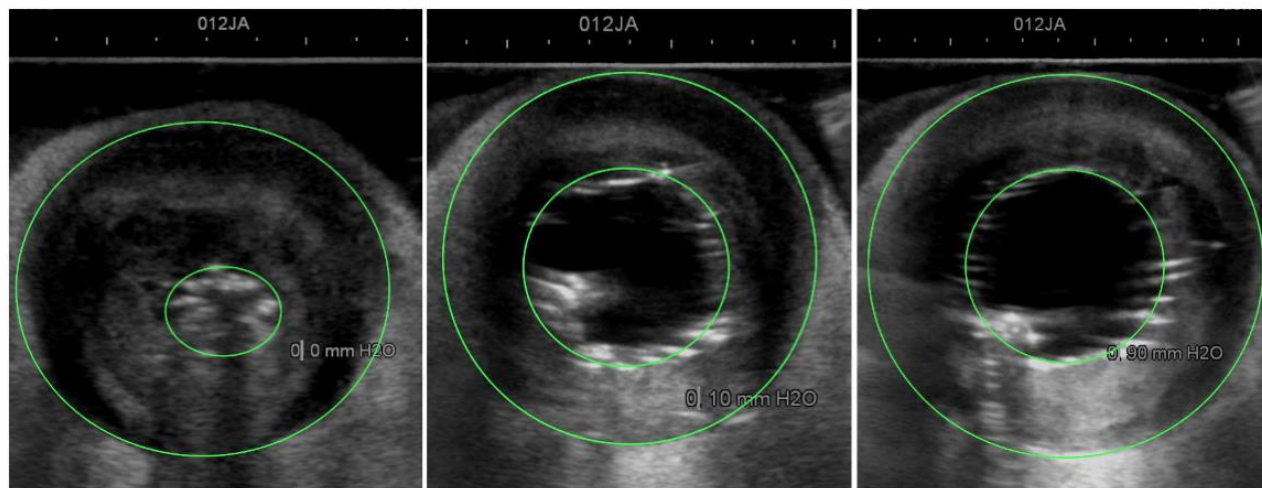

Regions of interests drawn in OsiriX. Patient 012 at location "0" at 0, 10 and 90 cmH<sub>2</sub>O. On US falsely labeled mm instead of cm

Table S1

| Demographics                                                                                                                                                                                      |                  |
|---------------------------------------------------------------------------------------------------------------------------------------------------------------------------------------------------|------------------|
| Parameter                                                                                                                                                                                         | No. of Patients  |
| Included patients                                                                                                                                                                                 | 18               |
| Females                                                                                                                                                                                           | 10 (56 %)        |
| Age, years                                                                                                                                                                                        | 43 [19-66]       |
| Body mass index (kg/m <sup>2</sup> )                                                                                                                                                              | 25.0 [20.2-32.0] |
| Disease duration                                                                                                                                                                                  | 8.8 [0-25.3]     |
| < 2 years                                                                                                                                                                                         | 5 (28 %)         |
| 2-10 years                                                                                                                                                                                        | 6 (33 %)         |
| >10 years                                                                                                                                                                                         | 7 (39 %)         |
| Location of disease                                                                                                                                                                               |                  |
| L1, Terminal Ileum                                                                                                                                                                                | 12 (67 %)        |
| L2, Colon                                                                                                                                                                                         | 0 (0 %)          |
| L3, Ileocolon                                                                                                                                                                                     | 5 (28 %)         |
| L4, Upper disease                                                                                                                                                                                 | 1 (6 %)          |
| Crohn Disease Activity Index                                                                                                                                                                      | 210 ± 94         |
| Harvey Bradshaw Index                                                                                                                                                                             | 8.0 ± 4.6        |
| Fecal Calprotectin (µg/g)*                                                                                                                                                                        | 251 [49-1422]    |
| C-Reactive Protein (mg/l)*                                                                                                                                                                        | 4.3 [0.6-29.4]   |
| Hemoglobin (mmol/l)                                                                                                                                                                               | 8.9 ± 0.7        |
| Albumin (g/l)                                                                                                                                                                                     | 36.3 ± 3.8       |
| Vitamin D (nmol/l)                                                                                                                                                                                | 69.5 ± 20.8      |
| Hematocrit                                                                                                                                                                                        | 0.42 ± 0.04      |
| Time between examinations, days*                                                                                                                                                                  | 0 [0-4]          |
| Time between US and Surgery, days*                                                                                                                                                                | 7.5 [1-26]       |
| Symptoms within last flair, n (%), days*                                                                                                                                                          |                  |
| Pain                                                                                                                                                                                              | 16 (89 %)        |
| Nausea                                                                                                                                                                                            | 13 (72 %)        |
| Vomit                                                                                                                                                                                             | 6 (33 %)         |
| Diarrhea                                                                                                                                                                                          | 11 (61 %)        |
| Bloody stools                                                                                                                                                                                     | 5 (28 %)         |
| Bloating                                                                                                                                                                                          | 12 (67 %)        |
| Weight loss                                                                                                                                                                                       | 8 (44 %)         |
| Fatigue                                                                                                                                                                                           | 3 (17 %)         |
| IBD Treatment, n (%)                                                                                                                                                                              |                  |
| None                                                                                                                                                                                              | 5 (28 %)         |
| Steroids                                                                                                                                                                                          | 5 (28 %)         |
| Immunosuppressors                                                                                                                                                                                 | 3 (17 %)         |
| Biological therapy                                                                                                                                                                                | 4 (22 %)         |
| Combo treatment                                                                                                                                                                                   | 1 (6 %)          |
| Note – Numbers in parenthesis are percentages. Numbers in brackets are ranges. Unless indicated otherwise, data are means ± standard deviations. * Median values and ranges. US = Ultrasonography |                  |

Table S2

| Correlation between Young's modulus and imaging     |                |          |
|-----------------------------------------------------|----------------|----------|
| Parameter                                           | Spearman's rho | P value  |
| CEUS                                                |                |          |
| Peak Enhancement                                    | 0.00           | P = .99  |
| Area Under Curve                                    | -0.04          | P = .89  |
| Wash-in Rate                                        | 0.08           | P = .76  |
| Wash-in Perfusion index                             | 0.00           | P = .99  |
| Rise Time                                           | -0.22          | P = .41  |
| Fall Time                                           | -0.09          | P = .74  |
| DCE-MRE                                             |                |          |
| Peak Enhancement                                    | 0.24           | P = .35  |
| Area Under Curve 70 s                               | -0.04          | P = .89  |
| Initial Slope                                       | 0.63           | P = .007 |
| Initial Slope Max                                   | 0.30           | P = .25  |
| Wash-in Perfusion Index                             | 0.03           | P = .90  |
| Rise Time                                           | -0.33          | P = .19  |
| Wash-out Slope 60 s                                 | 0.10           | P = .71  |
| Wash-out Slope 120 s                                | -0.17          | P = .52  |
| Note – § P value for One-way analysis of variance.  |                |          |
| CEUS = Contrast enhanced ultrasonography, DCE-MRE = |                |          |
| Dynamic Contrast Enhanced MR Enterography.          |                |          |

Figure S2. Correlation with MR enterography global score

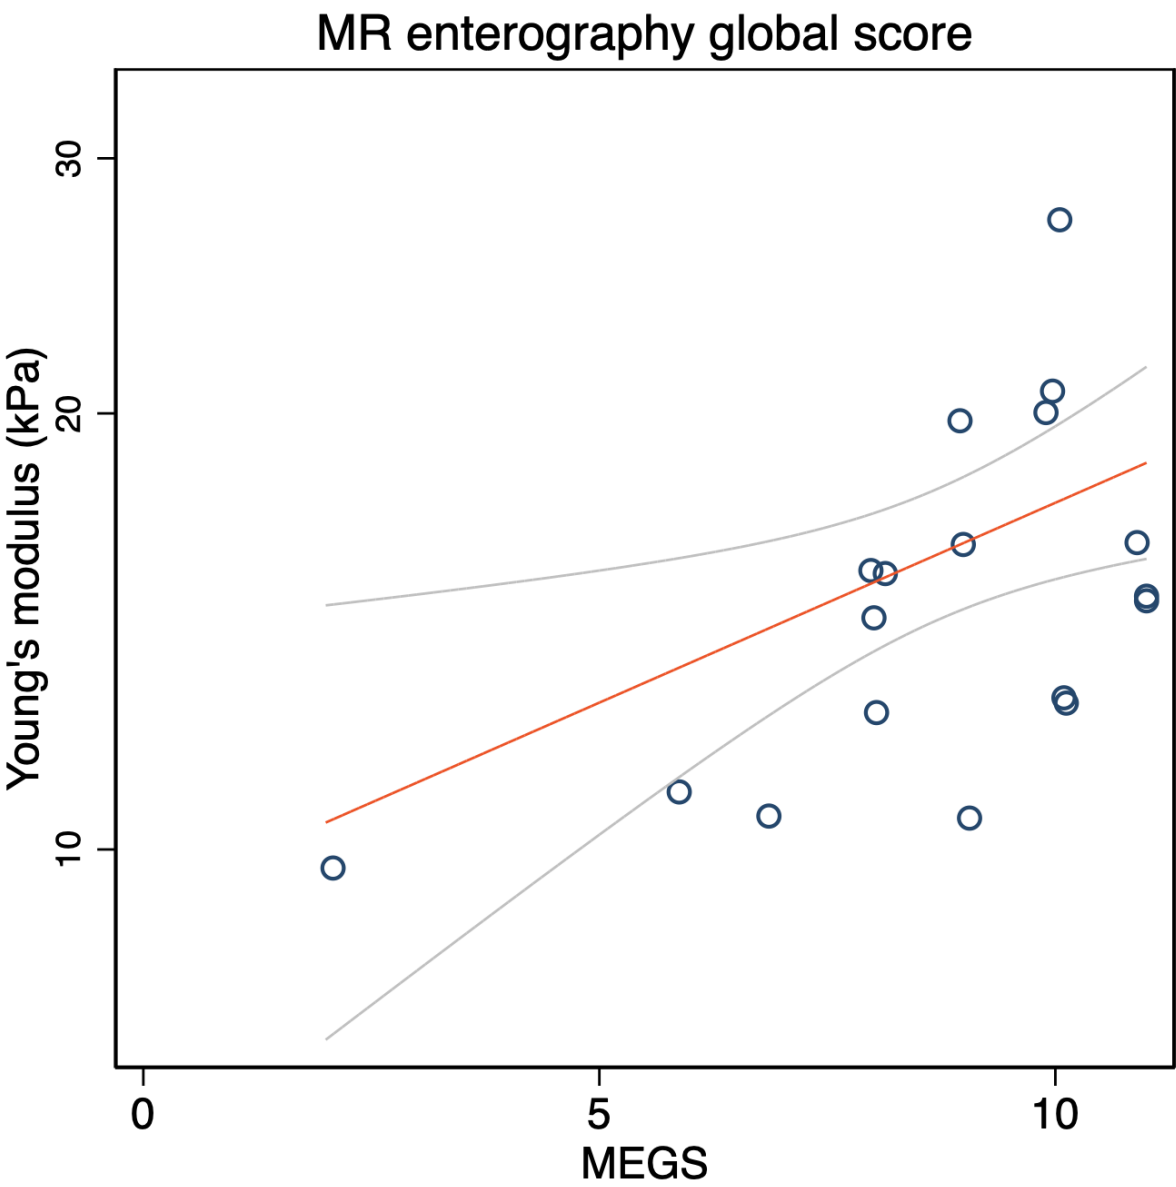

Association between stiffness of the stricture and MR enterography global score (MEGS) (Spearman's  $\rho=0.55$ ,  $P=0.018$ ).
